# Supplementary material
Source: PubMed Central journal article supplement (PMC5084066)
Supplement: am6b08808_si_001.pdf [file am6b08808_si_001.pdf]

**Supporting information**

**On a novel electro-stimulated drug delivery system  
based on PLLA composites exploiting the multiple  
functions of graphite nanoplatelets**

*Lorenza Gardella<sup>1</sup>, Samuele Colonna<sup>2</sup>, Alberto Fina<sup>2</sup>, Orietta Monticelli<sup>1\*</sup>*

*<sup>1</sup>Dipartimento di Chimica e Chimica Industriale, Università di Genova, Via Dodecaneso, 31, 16146  
Genova, Italy*

*<sup>2</sup>Dipartimento di Scienza Applicata e Tecnologia, Politecnico di Torino-sede di Alessandria, viale  
Teresa Michel, 5, 15121 Alessandria, Italy*

*\*orietta.monticelli@unige.it*

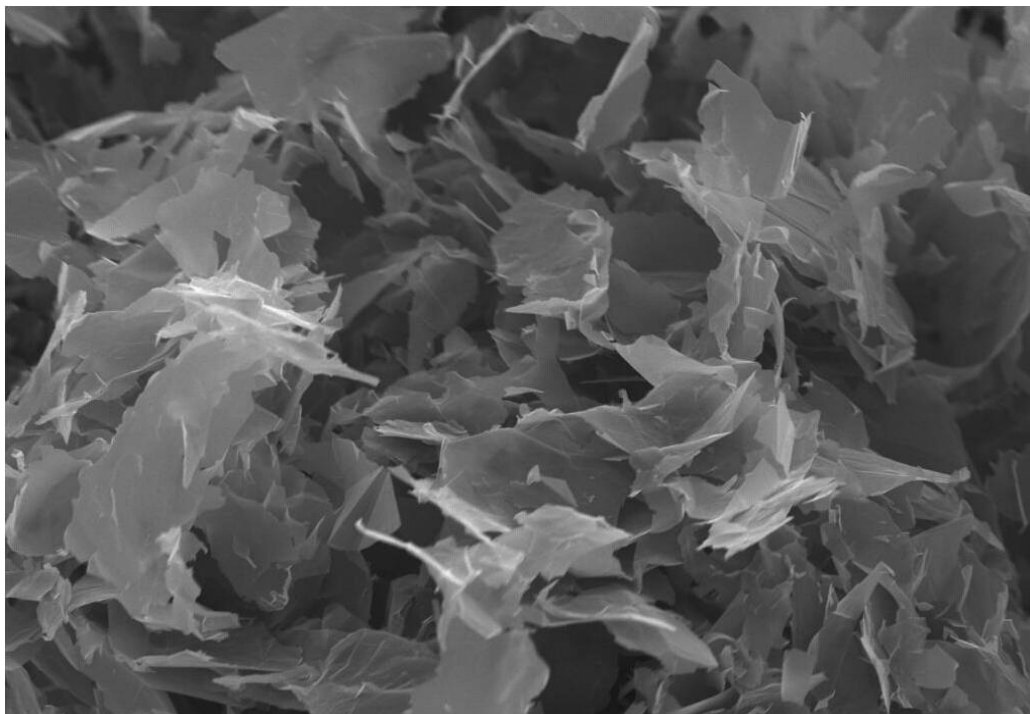

5 $\mu$ m

**Figure S1.** SEM micrograph of graphite nanoplatelets A12 grade from Graphene Supermarket

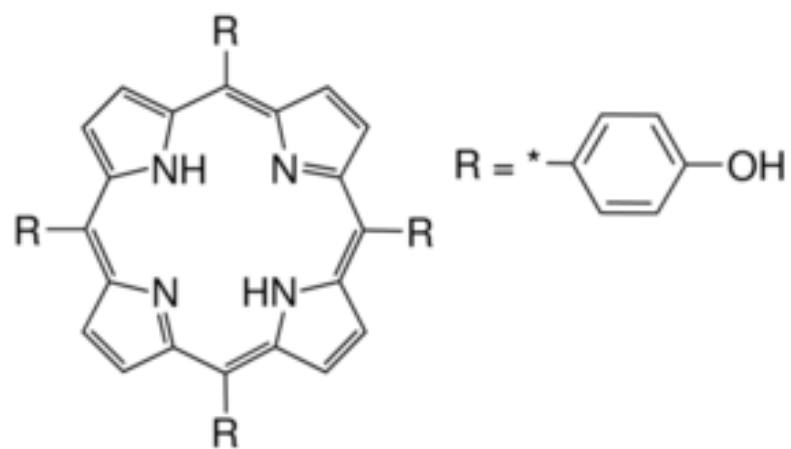

**Figure S2.** 5,10,15,20-tetrakis(4-hydroxyphenyl)-porphyrin (THPP)

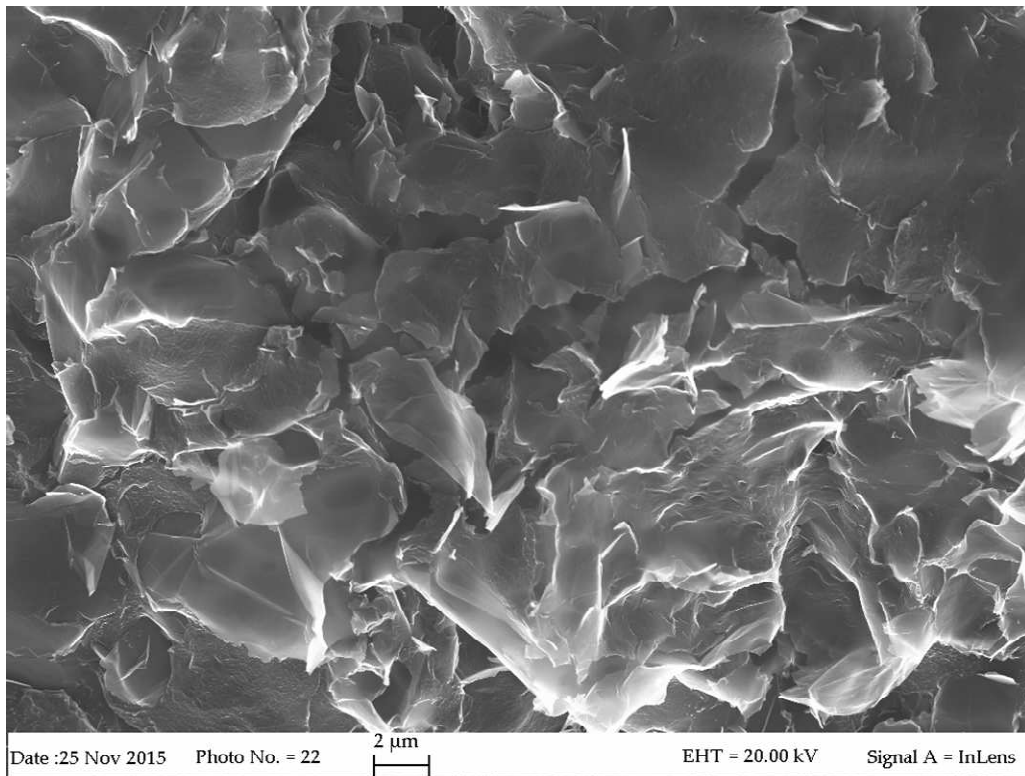

**Figure S3.** FE-SEM micrograph of PLLA\_G

**Table S1.** Characteristics of the used graphite

|                                 | <i>x-y Dimension</i><br><i>[<math>\mu\text{m}</math>]</i> | <i>Resistivity of the composite films</i><br><i>[<math>\Omega\text{m}</math>]</i> |
|---------------------------------|-----------------------------------------------------------|-----------------------------------------------------------------------------------|
| <i>Angstrom N006</i>            | 5                                                         | $1.3 \cdot 10^7$                                                                  |
| <i>Graphene Supermarket A12</i> | 8                                                         | $4.5 \cdot 10^{-2}$                                                               |
| <i>Asbury TC-307</i>            | 0.2                                                       | $1.6 \cdot 10^7$                                                                  |
